# Supplementary material
Source: MDPI journal article supplement (https://www.mdpi.com/2075-163X/13/5/708)
Supplement: s1 [file s1]

## 1. Petrographic description for other samples

### 1.1. Samples from the Langzishan Fm.

Sample 15LSG49-1 is a quartz sandstone, with the clastic particles mainly consisting of quartz (~90%), alkali feldspar (7%), and a small amount of dark minerals (3%). Alkali feldspar is mostly microcline with gridiron twinning (Fig. 14a).

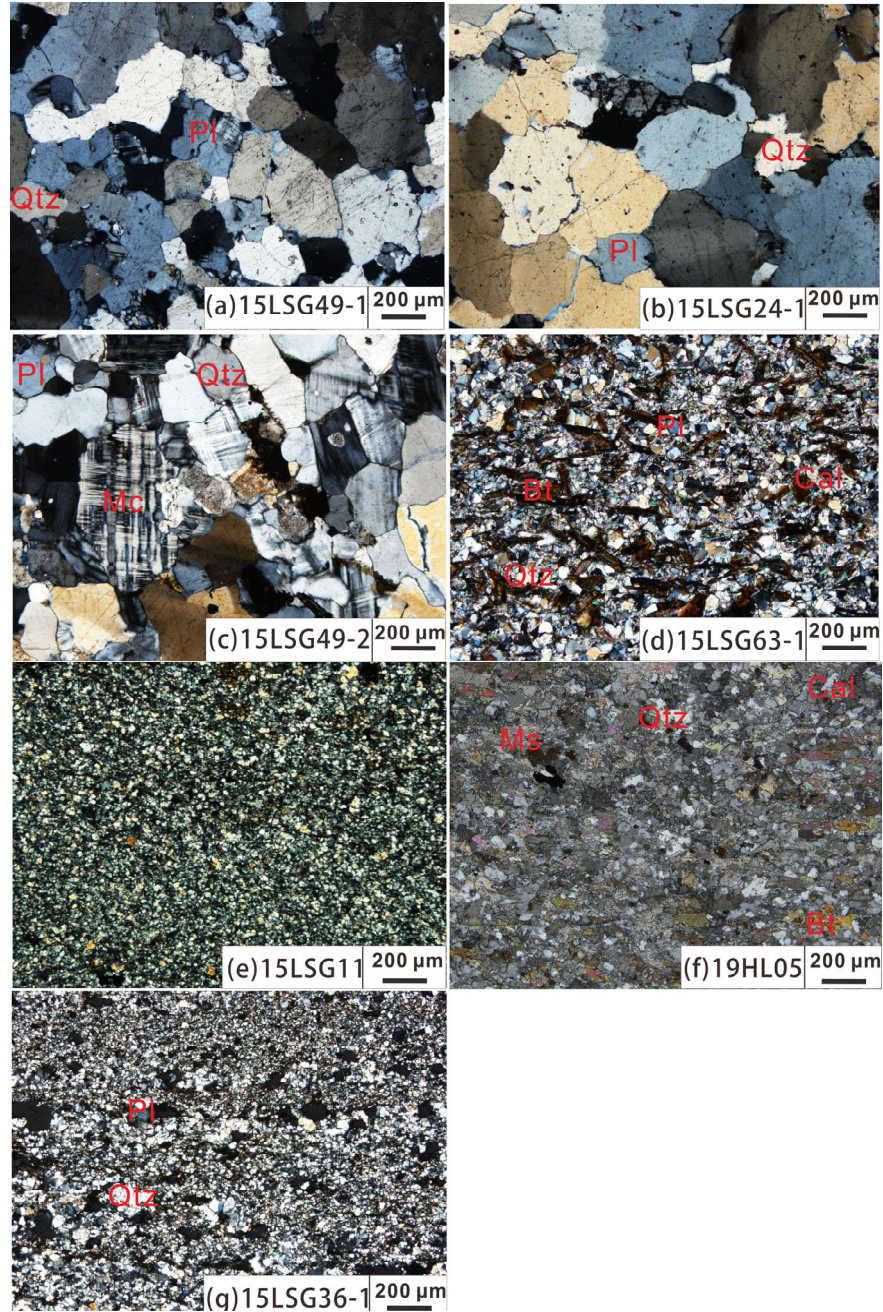

**Figure S1.** Supplementary thin-section micrographs of the Langzishan Fm. and the Li'eryu Fm. in the North Liaohe Group. (a) the sample 15LSG49-1 (quartz sandstone), (b) the sample 15LSG24-1 (quartz sandstone), (c) the sample 15LSG49-2 (quartz sandstone), (d) the sample 15LSG63-1 (meta-sandstone), (e) the sample 15LSG11 (siltstone), (f) the sample 19HL05 (meta-sandstone), (g) the sample 15LSG36-1 (meta-quartz sandstone). The abbreviations for the minerals are, Qtz-quartz, Mc-microcline, Pl-plagioclase, Ms-muscovite, Cal-calcite, Bt-biotite.

Sample 15LSG24-1 and 15LSG49-2 are feldspathic quartz sandstones, and the minerals mainly consist of quartz (85%), alkali feldspar (12%), and a small proportion of dark minerals (3%). The rocks are well-sorted, with contact cementation and particle support observed (Fig. 14b and c).

Sample 15LSG63-1 is a meta-sandstone, characterized by a mineral assemblage of quartz (45%), alkaline feldspar (25%), biotite (15%), calcite (8%), muscovite (5%), and a small proportion of dark minerals (2%). The rock's cement is calcareous, with contact cementation and particle support observed (Fig. 14d).

Sample 19LSG11 is a siltstone, exhibiting a silty structure. The clastic particles are mainly composed of quartz (70%), feldspar (20%), and muscovite (8%), with a small proportion of dark minerals (2%). The rock is well-sorted, with contact cementation and particle support evident (Fig. 14e).

### *1.2. Samples from the Li'eryu Fm.*

Sample 19HL05 is meta-sandstones, characterized by a mineral assemblage of quartz (45%), alkaline feldspar (25%), calcite (10%), biotite (13%), muscovite (5%), and a small proportion of dark minerals (2%). The rock's cement is calcareous, with contact cementation and particle support observed (Fig. 14f).

Sample 15LSG36-1 is meta-quartz sandstone, characterized by a mineral assemblage of quartz (~85%), alkaline feldspar (8%), biotite (~5%), and a small proportion of dark minerals (2%). The rock's cement is calcareous, with contact cementation and particle support observed (Fig. 14g).

## **2. Supplementary results of the detrital zircon U-Pb LA-ICP-MS ages**

### *2.1. The Langzishan Fm.*

Zircon grains selected from the quartz sandstone (15LSG49-1) in the bottom layer of the Langzishan Fm., are light brown and subhedral with a short columnar shape and aspect ratios of less than 2.5:1 (Fig. 6a). A total of 60 zircons were analyzed, which showed oscillatory zonings with Th/U ratios ranging from 0.17 to 1.72, indicating that they are typical magmatic zircons. Out of the 60 zircons, 50 were concordant, most yielding  $^{207}\text{Pb}/^{206}\text{Pb}$  ages in the range 2433-2736 Ma, with an age peak at  $2538 \pm 13$  Ma. A small number of grains gave a young age of  $2239 \pm 14$  Ma and some gave an older age of  $2876 \pm 10$  Ma (Fig. 7a).

Two zircons extracted from the pebbly quartz sandstones (15LSG37-1 and 19LSG07) are subhedral, prismatic, or rounded in shape with a length of approximately 60-100  $\mu\text{m}$  and a width of 40-70  $\mu\text{m}$  (Fig. 6b and c). Out of the 60 zircons analyzed from 15LSG37-1, 48 yielded concordant data showing  $^{206}\text{Pb}/^{207}\text{Pb}$  ages of 2190-3031 Ma, with an age peak at  $2508 \pm 17$  Ma (Fig. 7b). The analyzed zircons in 19LSG07 showed oscillatory zonings with Th/U ratios ranging from 0.51-1.54, indicating that they are typical magmatic zircons. 17 concordant data yielded  $^{206}\text{Pb}/^{207}\text{Pb}$  ages of 2437-2547 Ma with an age peak at  $2491 \pm 14$  Ma (Fig. 7c).

The zircon grains from feldspathic quartz sandstones (15LSG24-1 and 15LSG49-2) are subhedral, prismatic, or oval in shape with aspect ratios of less than 3:1 (Fig. 6d and e). The analyzed zircons from 15LSG24-1 showed oscillatory zonings with Th/U ratios of 0.19-1.20, indicating that they are typical magmatic zircons. Out of the 56 effective data points,  $^{206}\text{Pb}/^{207}\text{Pb}$  ages of 2105-2564 Ma were obtained, with an age peak at  $2465 \pm 16$  Ma (refer to Fig. 7d). The analyzed zircons from 15LSG49-2 showed obvious oscillatory zonings with Th/U ratios of 0.19-1.28, indicating that they are typical magmatic zircons. 54 effective data points yielded  $^{206}\text{Pb}/^{207}\text{Pb}$  ages of 2368-2678 Ma, with an age peak at  $2525 \pm 14$  Ma. The other two analyzed points yielded two older ages of  $3187 \pm 20$  Ma and  $4226 \pm 18$  Ma (Fig. 7e).

The metamorphic sandstone sample (15LSG63-1) contains light brown zircons that are short columnar with aspect ratios up to 2:1 and subhedral shapes. The majority of zircons are magmatic zircons, as indicated by CL image results (Fig. 6f), except for one zircon ( $2160 \pm 43$  Ma) that is identified as a metamorphic zircon by the zircon CL image.

Of the 60 zircons analyzed, 46 yielded effective data with  $^{206}\text{Pb}/^{207}\text{Pb}$  ages ranging from 2457–2713 Ma, and the weighted average age was  $2488 \pm 13$  Ma (Fig. 7f). The zircons display oscillatory zonings with Th/U ratios ranging from 0.37 to 4.17.

The siltstone sample (19LSG06) contains small, subhedral, short prismatic or oval zircon grains with subhedral shapes and aspect ratios less than 2:1, as shown by CL images (Fig. 6g). The 80 zircons analyzed showed dense oscillatory or patched zonings with Th/U ratios ranging from 0.31–1.19. Of the 49 effective data,  $^{206}\text{Pb}/^{207}\text{Pb}$  ages ranged from 2378–2622 Ma, with the age peak at  $2516 \pm 8.2$  Ma (Fig. 7g). Five analytical points gave younger age range of 2113–2210 Ma, and the peak was at  $2173 \pm 31$  Ma.

Zircons from the quartz sandstone samples (19LSG02-2 and 19LSG04) are light brown, short columnar, and have aspect ratios less than 3:1 (Fig. 6h and i). Of the 54 effective analytical zircons from 19LSG02-2, Th/U ratios ranged from 0.29–1.47, with  $^{206}\text{Pb}/^{207}\text{Pb}$  ages ranging from 2446–2747 Ma (Fig. 7h). The age peak was at  $2563 \pm 14$  Ma, and there were two older ages of  $3113 \pm 16$  Ma and  $3309 \pm 18$  Ma and a younger age of  $2226 \pm 38$  Ma. Of the 70 zircons analyzed from 19LSG04, 46 effective data yielded  $^{206}\text{Pb}/^{207}\text{Pb}$  ages ranging from 2456–2678 Ma, and the age peak was at  $2532 \pm 13$  Ma (Fig. 7i). The zircons showed oscillatory zonings with Th/U ratios ranging from 0.31 to 1.33 and are typical magmatic zircons. Another younger age of  $2214 \pm 30$  Ma and an older age of  $2959 \pm 18$  Ma were also present.

The zircon grains extracted from sample 19LSG14, which is a garnet mica schist, exhibit short columnar and euhedral morphology with aspect ratios less than 2.5:1 (Fig. 6j). Among the analyzed 84 zircons, only one grain has a Th/U ratio of 0.08 while the rest show oscillatory zonings and Th/U ratios ranging from 0.32 to 1.85, indicating they are typical magmatic zircons. Out of 54 effective data, the  $^{206}\text{Pb}/^{207}\text{Pb}$  age ranges from 1945 to 2671 Ma, with the main age peak at  $2505 \pm 19$  Ma and a secondary peak at  $2185 \pm 36$  Ma (Fig. 7j).

The zircon grains from the siltstone sample (19LSG11) have a short columnar, semi-idiomorphic shape with aspect ratios less than 2.5:1 (Fig. 6k). The analyzed 40 zircons exhibit oscillatory zonings and Th/U ratios ranging from 0.30 to 1.15, indicating that they are also typical magmatic zircons. Among the 22 effective data, the  $^{206}\text{Pb}/^{207}\text{Pb}$  age were 2117–2581 Ma with an age peak at  $2341 \pm 53$  Ma (Fig. 7k).

## 2.2. The Li'eryu Fm.

Zircon grains extracted from metamorphic sandstones (19HL05-2 and 19LSG15) are short columnar or rounded with aspect ratios less than 2:1 (Fig. 6l and m). Of the 80 zircons analyzed from sample 19HL05, 74 effective data points yielded an  $^{206}\text{Pb}/^{207}\text{Pb}$  age of  $2125 \pm 15$  Ma with an age peak at  $2125 \pm 15$  Ma. These zircons show oscillatory zoning with Th/U ratios ranging from 0.08 to 0.88. For sample 19LSG15, the 70 zircons analyzed also show oscillatory zoning with Th/U ratios ranging from 0.33 to 1.20, and 55 effective data points yielded an  $^{206}\text{Pb}/^{207}\text{Pb}$  age range of 2056–2270 Ma with an age peak at  $2171 \pm 10$  Ma. Two older ages of  $2513 \pm 20$  Ma and  $2514 \pm 19$  Ma are also presented (Fig. 7m).

In sample 19LSG13, zircon grains extracted from the siltstone are small and short columnar, with aspect ratios less than 2:1 (Fig. 6n). The 80 zircons analyzed show oscillatory zoning and are typical magmatic zircons. Of the 53 effective data points, the  $^{206}\text{Pb}/^{207}\text{Pb}$  age range was 2077–2295 Ma with an age peak at  $2206 \pm 25$  Ma (Fig. 7n). Three other analysis points yielded older ages of  $2479 \pm 18$  Ma,  $2506 \pm 17$  Ma, and  $2605 \pm 17$  Ma.

Zircon grains picked out from metamorphic sandstone (sample 15LSG36-1) are light brown, short columnar, and have aspect ratios less than 2.5:1 (Fig. 6o). Of the 60 zircons analyzed, some zircons have varying degrees of lead loss, but all show typical magmatic zircon oscillatory zoning. Of the 14 effective data points, the  $^{206}\text{Pb}/^{207}\text{Pb}$  age range was 2042–2220 Ma, with an age peak at  $2221 \pm 43$  Ma. Another young age of  $1846 \pm 18$  Ma and an older age of  $2483 \pm 15$  Ma were also obtained (Fig. 7o).
